# Supplementary material for: Fragmented lignin-assisted synthesis of a hierarchical ZnO nanostructure for ammonia gas sensing
Source: Royal Society of Chemistry journal article supplement (doi:10.1039/c8ra05874a), 2019-01-01

## Fragmented Lignin Assisted Synthesis of hierarchical ZnO nanostructure for ammonia gas sensing

Kanchan M Joshi<sup>a</sup>, Dnyaneshwar R Shinde<sup>a</sup>, Latesh K Nikam<sup>b</sup>, Rajendra Panmand<sup>c</sup>, Yogesh A Sethi<sup>c</sup>, Bharat B Kale<sup>a,c</sup>, Manohar G Chaskar<sup>a</sup>

This supporting information from

ESI-1

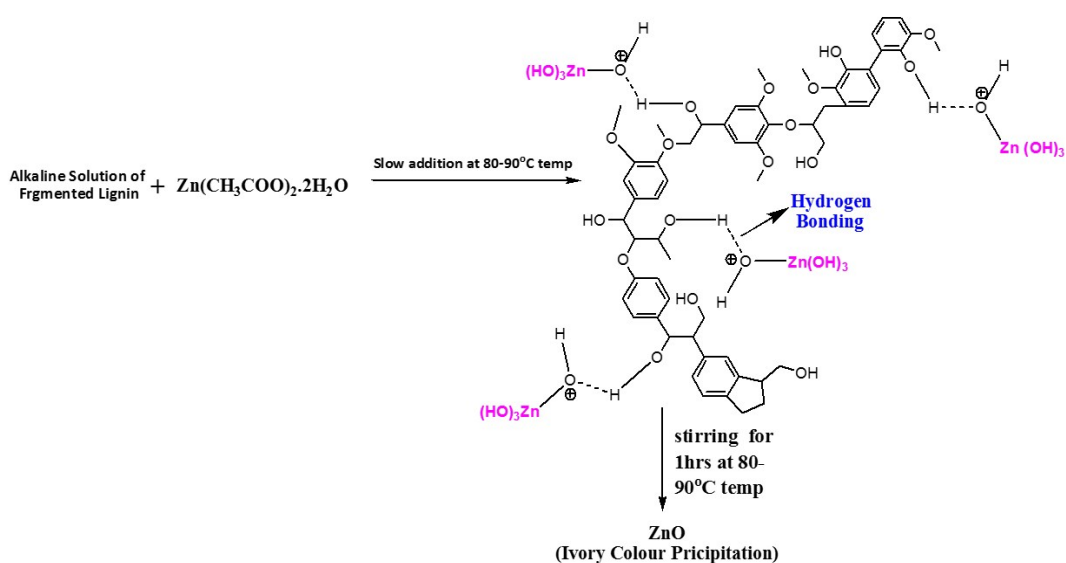

### Reaction Mechanism

ESI-2

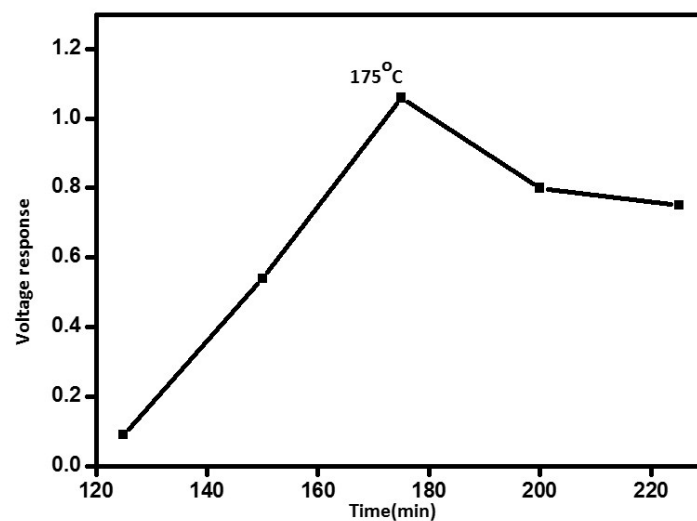

-Best Working Temperature

### ESI-3

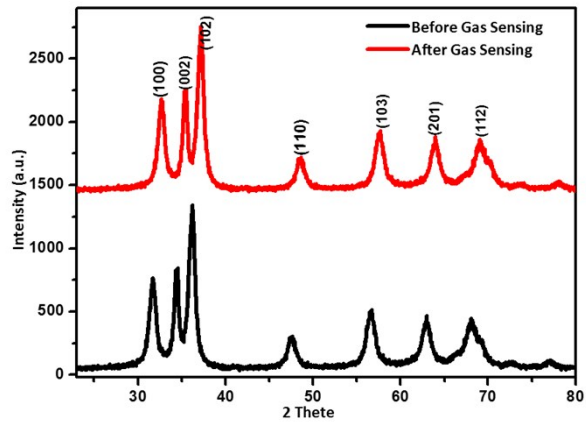

### Long Term Stability

#### ESI-4 Gas Sensing Response of ZnO without fragmented lignin

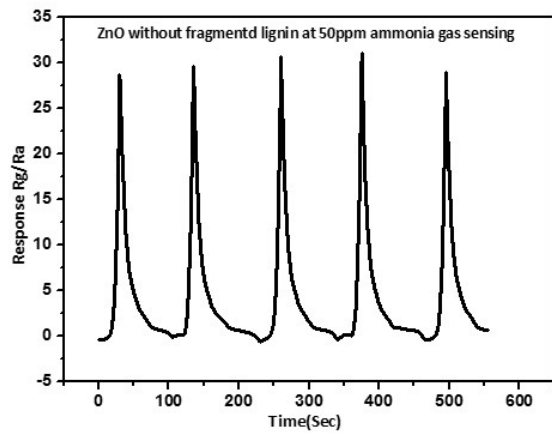

Supplement: c8ra05874a1.pdf [file c8ra05874a1.pdf]
